# Supplementary material for: An integrated bioinformatics analysis of the S100 in head and neck squamous cell carcinoma
Source: PubMed Central journal article supplement — Transl Cancer Res. 2023 Apr 12;12(4):717–31. doi: 10.21037/tcr-22-1353 (PMC10174761; doi:10.21037/tcr-22-1353), 2023-04-12
Supplement: tcr-12-04-717-supplementary.pdf [file tcr-12-04-717-supplementary.pdf]

**Table S1** Full names and biological functions of 19 S100 family members

| S100 protein family | Description                      | Encoded gene   | Functions                                                                                                                                          |
|---------------------|----------------------------------|----------------|----------------------------------------------------------------------------------------------------------------------------------------------------|
| S100A1              | S100 calcium binding protein A1  | <i>S100A1</i>  | Inhibit microtubule assembly; inhibit protein kinase C-mediated phosphorylation                                                                    |
| S100A2              | S100 calcium binding protein A2  | <i>S100A2</i>  | Tumor suppressor                                                                                                                                   |
| S100A3              | S100 calcium binding protein A3  | <i>S100A3</i>  | High affinity for Zinc; highly expressed in human hair cuticle                                                                                     |
| S100A4              | S100 calcium binding protein A4  | <i>S100A4</i>  | Motility; invasion; tumor metastasis                                                                                                               |
| S100A5              | S100 calcium binding protein A5  | <i>S100A5</i>  | Higher affinity of $Ca^{2+}$                                                                                                                       |
| S100A6              | S100 calcium binding protein A6  | <i>S100A6</i>  | Stimulate $Ca^{2+}$ dependent insulin release; stimulate prolactin secretion; exocytosis; implicated in melanoma                                   |
| S100A7              | S100 calcium binding protein A7  | <i>S100A7</i>  | Overexpressed in hyperproliferative skin diseases; antibacterial activity; immunomodulatory activity                                               |
| S100A8              | S100 calcium binding protein A8  | <i>S100A8</i>  | Antifungal and antibacterial activity; inhibit casein kinase                                                                                       |
| S100A9              | S100 calcium binding protein A9  | <i>S100A9</i>  | Inhibit casein kinase; associated with the disease cystic fibrosis; antifungal and antibacterial activity                                          |
| S100A10             | S100 calcium binding protein A10 | <i>S100A10</i> | exocytosis and endocytosis                                                                                                                         |
| S100A11             | S100 calcium binding protein A11 | <i>S100A11</i> | Motility; invasion; tubulin polymerization; tumor metastasis                                                                                       |
| S100A12             | S100 calcium binding protein A12 | <i>S100A12</i> | Signal transduction; modulate various neutrophil activities; antibacterial activity                                                                |
| S100A13             | S100 calcium binding protein A13 | <i>S100A13</i> | Signal transduction                                                                                                                                |
| S100A14             | S100 calcium binding protein A14 | <i>S100A14</i> | Tumor suppressor; lower in cancerous tissue                                                                                                        |
| S100A16             | S100 calcium binding protein A16 | <i>S100A16</i> | Promote differentiation of adipocytes                                                                                                              |
| S100B               | S100 calcium binding protein B   | <i>S100B</i>   | Neurite extension; proliferation of melanoma cells, stimulate $Ca^{2+}$ fluxes, inhibit PKC-mediated phosphorylation; inhibit microtubule assembly |
| S100P               | S100 calcium binding protein P   | <i>S100P</i>   | Associated with prostate cancer                                                                                                                    |
| S100Z               | S100 calcium binding protein Z   | <i>S100Z</i>   | Higher affinity of $Ca^{2+}$                                                                                                                       |
| S100A7A             | S100 calcium binding protein A7A | <i>S100A7A</i> | Involved in epidermal differentiation and inflammation                                                                                             |

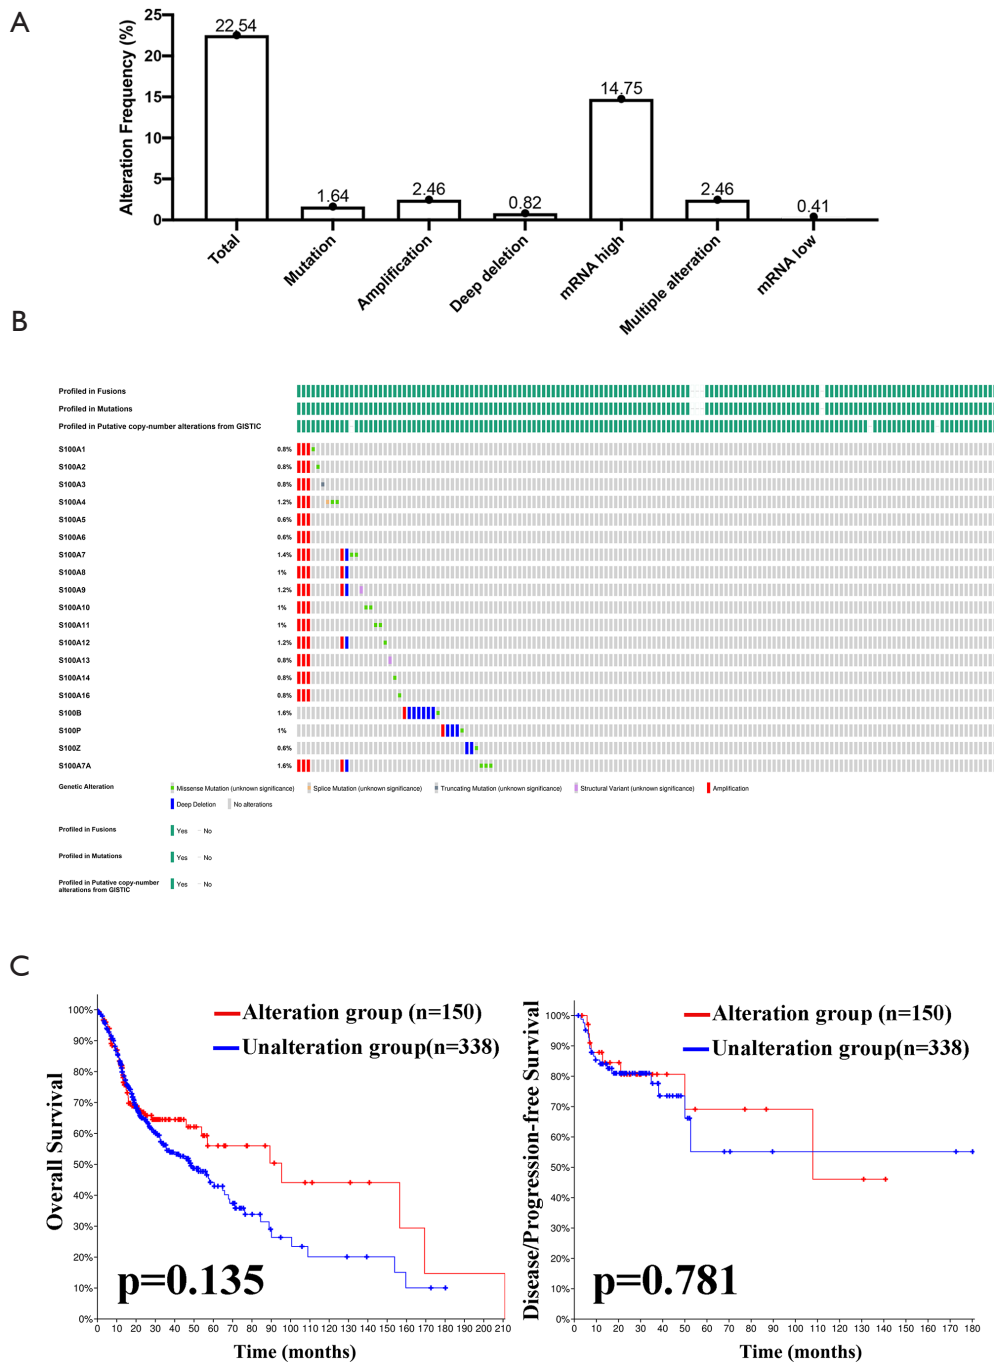

**Figure S1** S100s gene mutation analysis in HNSCC. (A,B) S100 genes expression and mutations in 488 HNSCC patients were analyzed using cBioPortal. (C) Correlation between S100s gene mutation and survival in HNSCC patients. mRNA, messenger RNA; GISTIC, genomic identification of significant targets in cancer; HNSCC, head and neck squamous cell carcinoma.

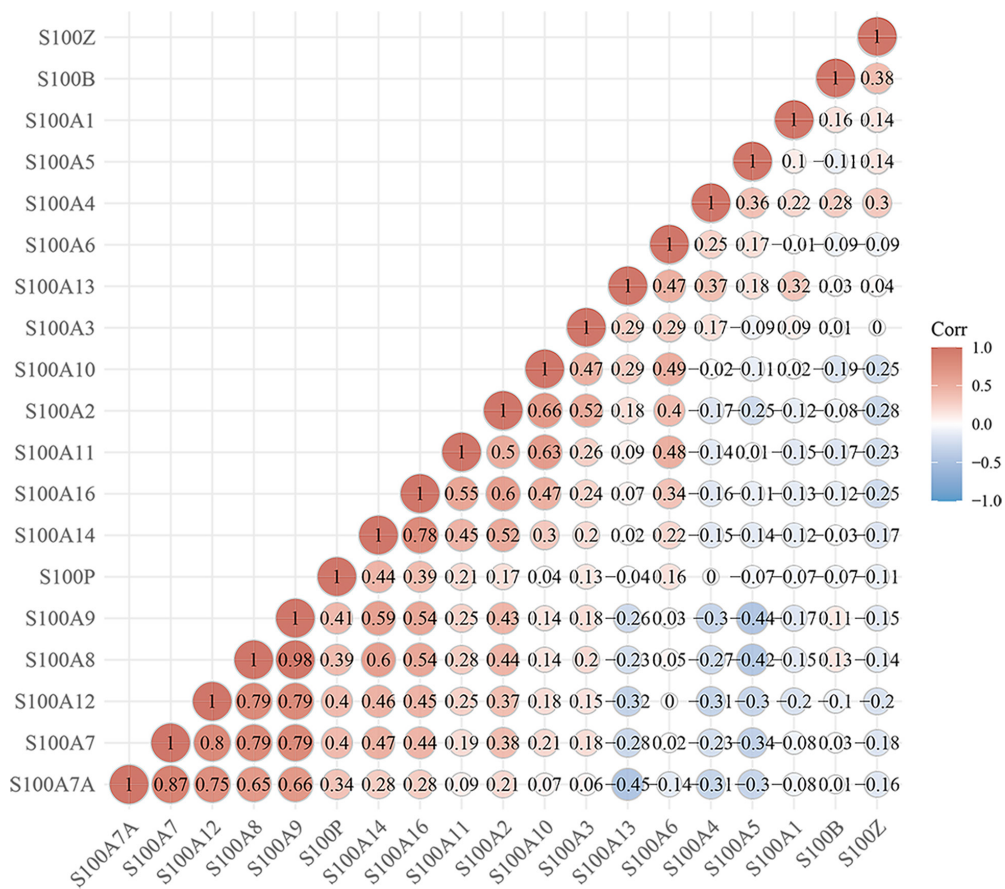

**Figure S2** The associations among S100s in HNSCC were analyzed using the cBioPortal database. Darker colors indicate a stronger correlation. Corr, correlation; HNSCC, head and neck squamous cell carcinoma.

**Table S2** The average values of high and low mRNA expression level for S100 family members in HNSCC patients

| S100 protein family | mRNA expression level | Number of HNSCC patients | Average value | P value |
|---------------------|-----------------------|--------------------------|---------------|---------|
| S100A1              | High                  | 252                      | 1.038         | 0.291   |
| S100A1              | Low                   | 252                      | 0.313         |         |
| S100A2              | High                  | 252                      | 12.443        | 3.105   |
| S100A2              | Low                   | 252                      | 10.527        |         |
| S100A3              | High                  | 252                      | 5.111         | 1.482   |
| S100A3              | Low                   | 252                      | 3.526         |         |
| S100A4              | High                  | 252                      | 8.349         | 0.384   |
| S100A4              | Low                   | 252                      | 6.949         |         |
| S100A5              | High                  | 252                      | 1.639         | <0.001  |
| S100A5              | Low                   | 252                      | 0.527         |         |
| S100A6              | High                  | 252                      | 11.898        | 3.247   |
| S100A6              | Low                   | 252                      | 10.635        |         |
| S100A7              | High                  | 252                      | 12.479        | 0.108   |
| S100A7              | Low                   | 252                      | 7.537         |         |
| S100A7A             | High                  | 252                      | 6.500         | <0.001  |
| S100A7A             | Low                   | 252                      | 1.759         |         |
| S100A8              | High                  | 252                      | 13.600        | 2.930   |
| S100A8              | Low                   | 252                      | 10.182        |         |
| S100A9              | High                  | 252                      | 14.943        | 5.557   |
| S100A9              | Low                   | 252                      | 11.844        |         |
| S100A10             | High                  | 252                      | 11.219        | <0.01   |
| S100A10             | Low                   | 252                      | 10.019        |         |
| S100A11             | High                  | 252                      | 12.768        | 0.053   |
| S100A11             | Low                   | 252                      | 11.927        |         |
| S100A12             | High                  | 252                      | 7.799         | 0.235   |
| S100A12             | Low                   | 252                      | 3.938         |         |
| S100A13             | High                  | 252                      | 4.164         | 3.514   |
| S100A13             | Low                   | 252                      | 2.888         |         |
| S100A14             | High                  | 252                      | 10.978        | 6.704   |
| S100A14             | Low                   | 252                      | 9.182         |         |
| S100A16             | High                  | 252                      | 10.550        | <0.01   |
| S100A16             | Low                   | 252                      | 9.468         |         |
| S100B               | High                  | 252                      | 4.364         | <0.001  |
| S100B               | Low                   | 252                      | 2.355         |         |
| S100P               | High                  | 252                      | 8.820         | 0.141   |
| S100P               | Low                   | 252                      | 5.169         |         |
| S100Z               | High                  | 252                      | 0.229         | <0.05   |
| S100Z               | Low                   | 252                      | 0.035         |         |

mRNA, messenger RNA; HNSCC, head and neck squamous cell carcinoma.

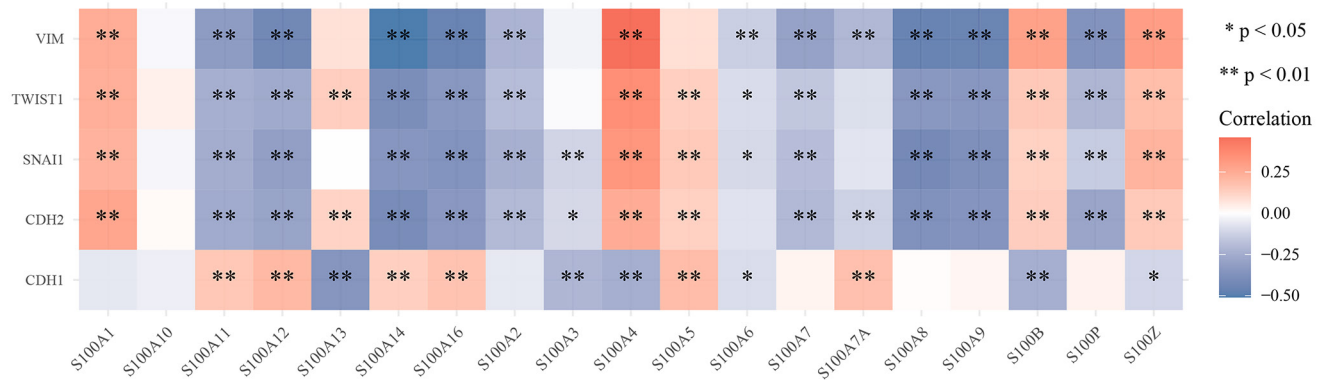

**Figure S3** Heatmap of the correlations among five EMT genes and S100 genes in HNSCC. EMT, epithelial-mesenchymal transition; HNSCC, head and neck squamous cell carcinoma.

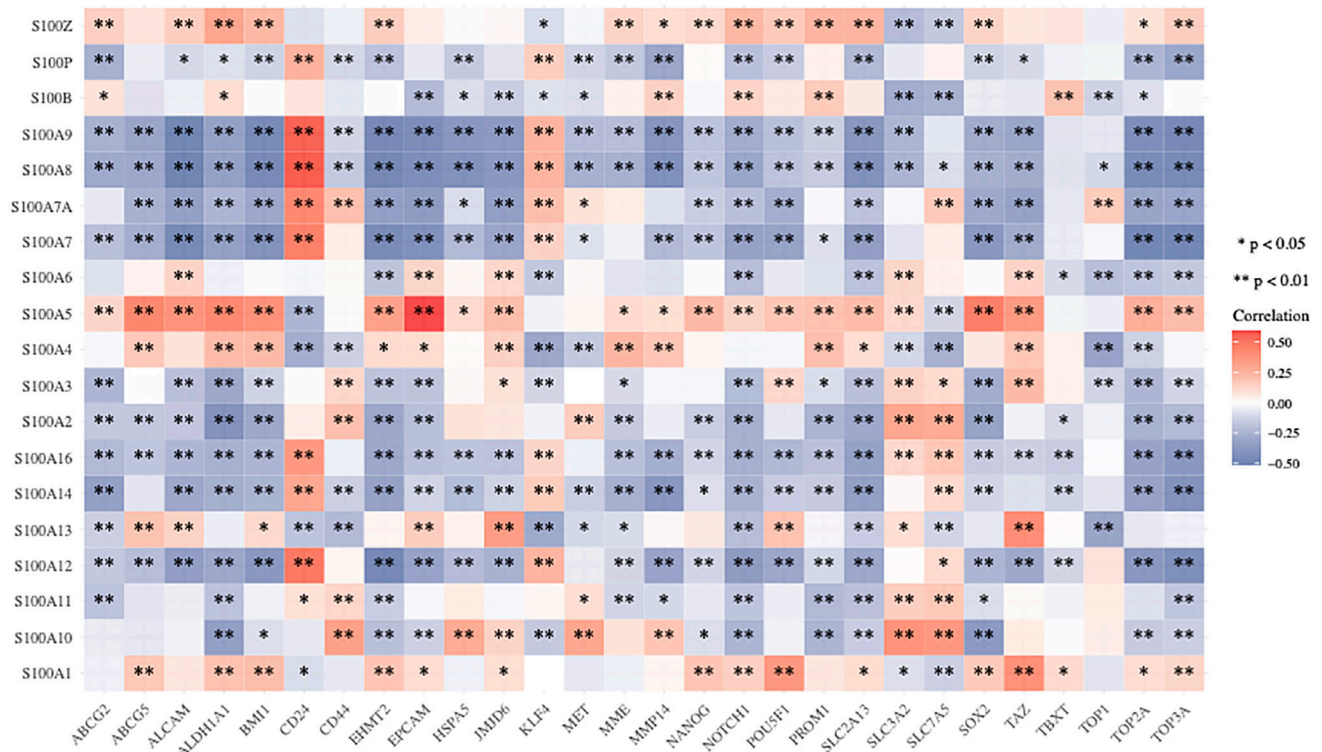

**Figure S4** Heatmap of the correlations among CSC-related genes and S100 genes in HNSCC. CSC, cancer stem cell; HNSCC, head and neck squamous cell carcinoma.

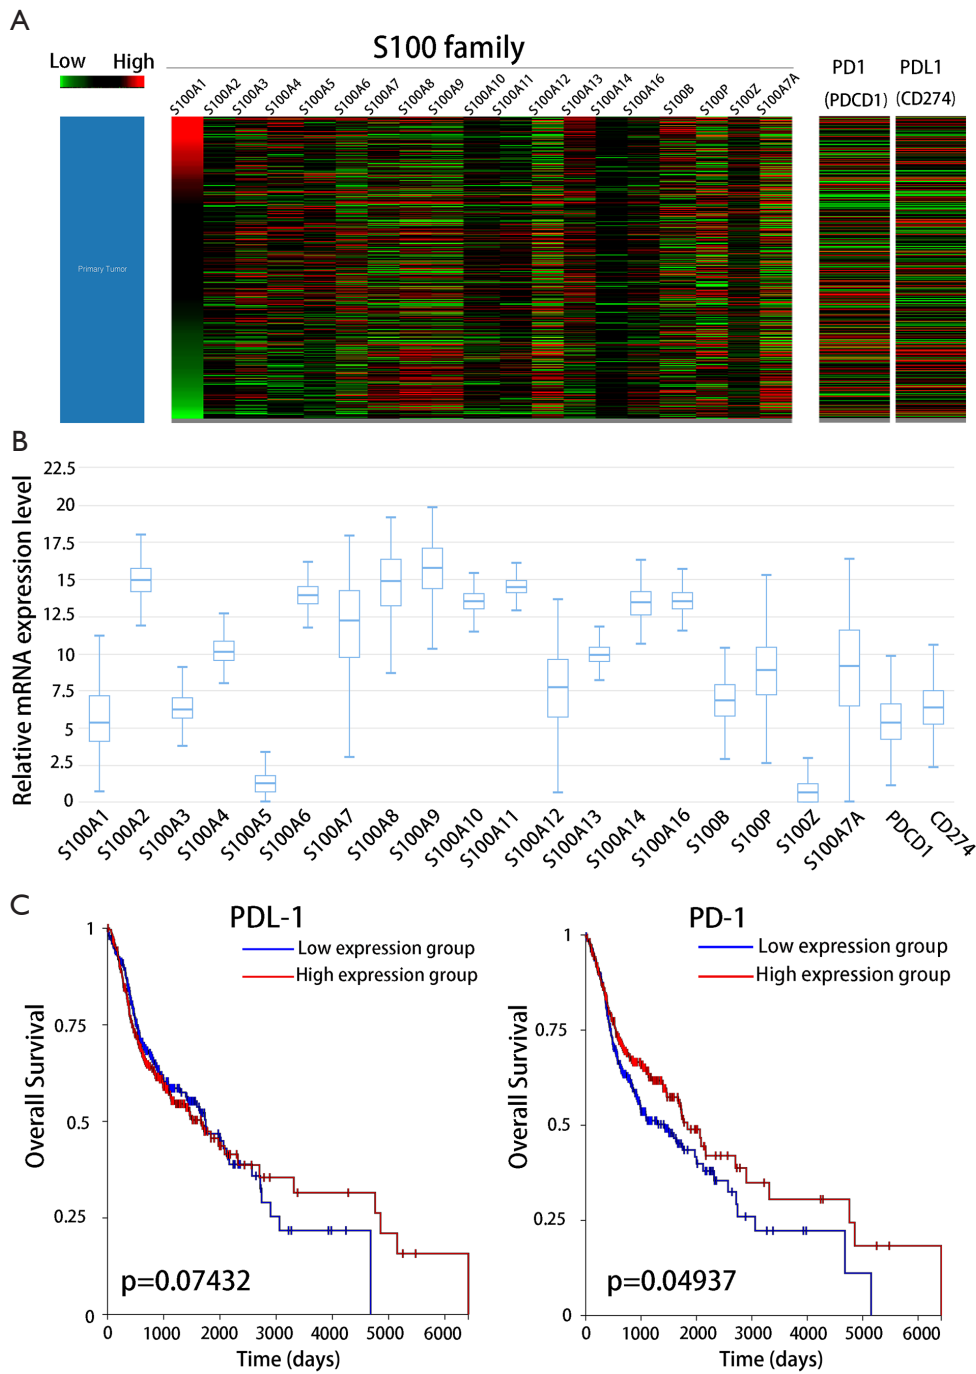

**Figure S5** Roles of gene PD-1, PD-L1 in HNSCC. (A) Heatmap of the expression of gene PD-1, PD-L1 and S100 genes in HNSCC. (B) Transcriptional expression of gene PD-1, PD-L1 and S100 genes in HNSCC. (C) Correlation between PD-1, PD-L1 expression and OS in HNSCC patients. PD-1, programmed death 1; PD-L1, programmed death ligand 1; HNSCC, head and neck squamous cell carcinoma; OS, overall survival.
